# Supplementary material
Source: PubMed Central journal article supplement (PMC6946858)
Supplement: NIHMS1545336-supplement-2.pdf [file NIHMS1545336-supplement-2.pdf]

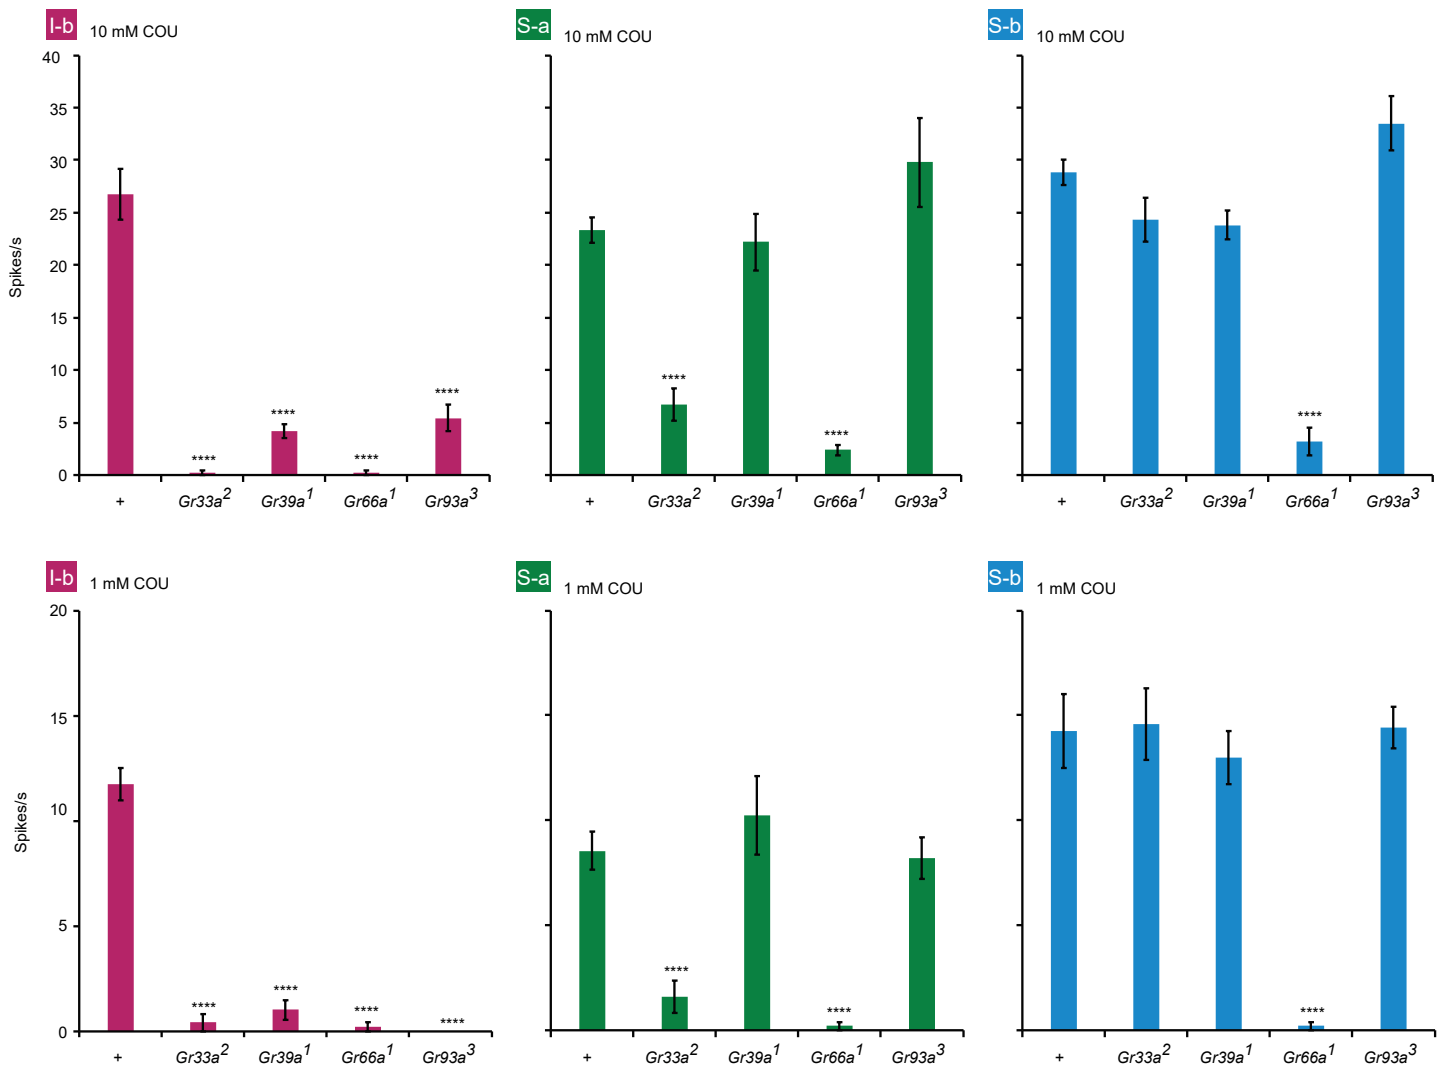

**Figure S1. Requirements for responses to COU differ in different classes of sensilla. Related to Figure 2.** One-way ANOVA followed by Dunnett's multiple comparison test,  $n = 8-28$ , \* $p < 0.05$ , \*\* $p < 0.01$ , \*\*\* $p < 0.001$ , \*\*\*\* $p < 0.0001$ . We note that a study of three individual S sensilla found a phenotype for 1 mM coumarin in Gr33a and Gr66a mutants, in agreement with our results, but also in a Gr93a mutant [S1].

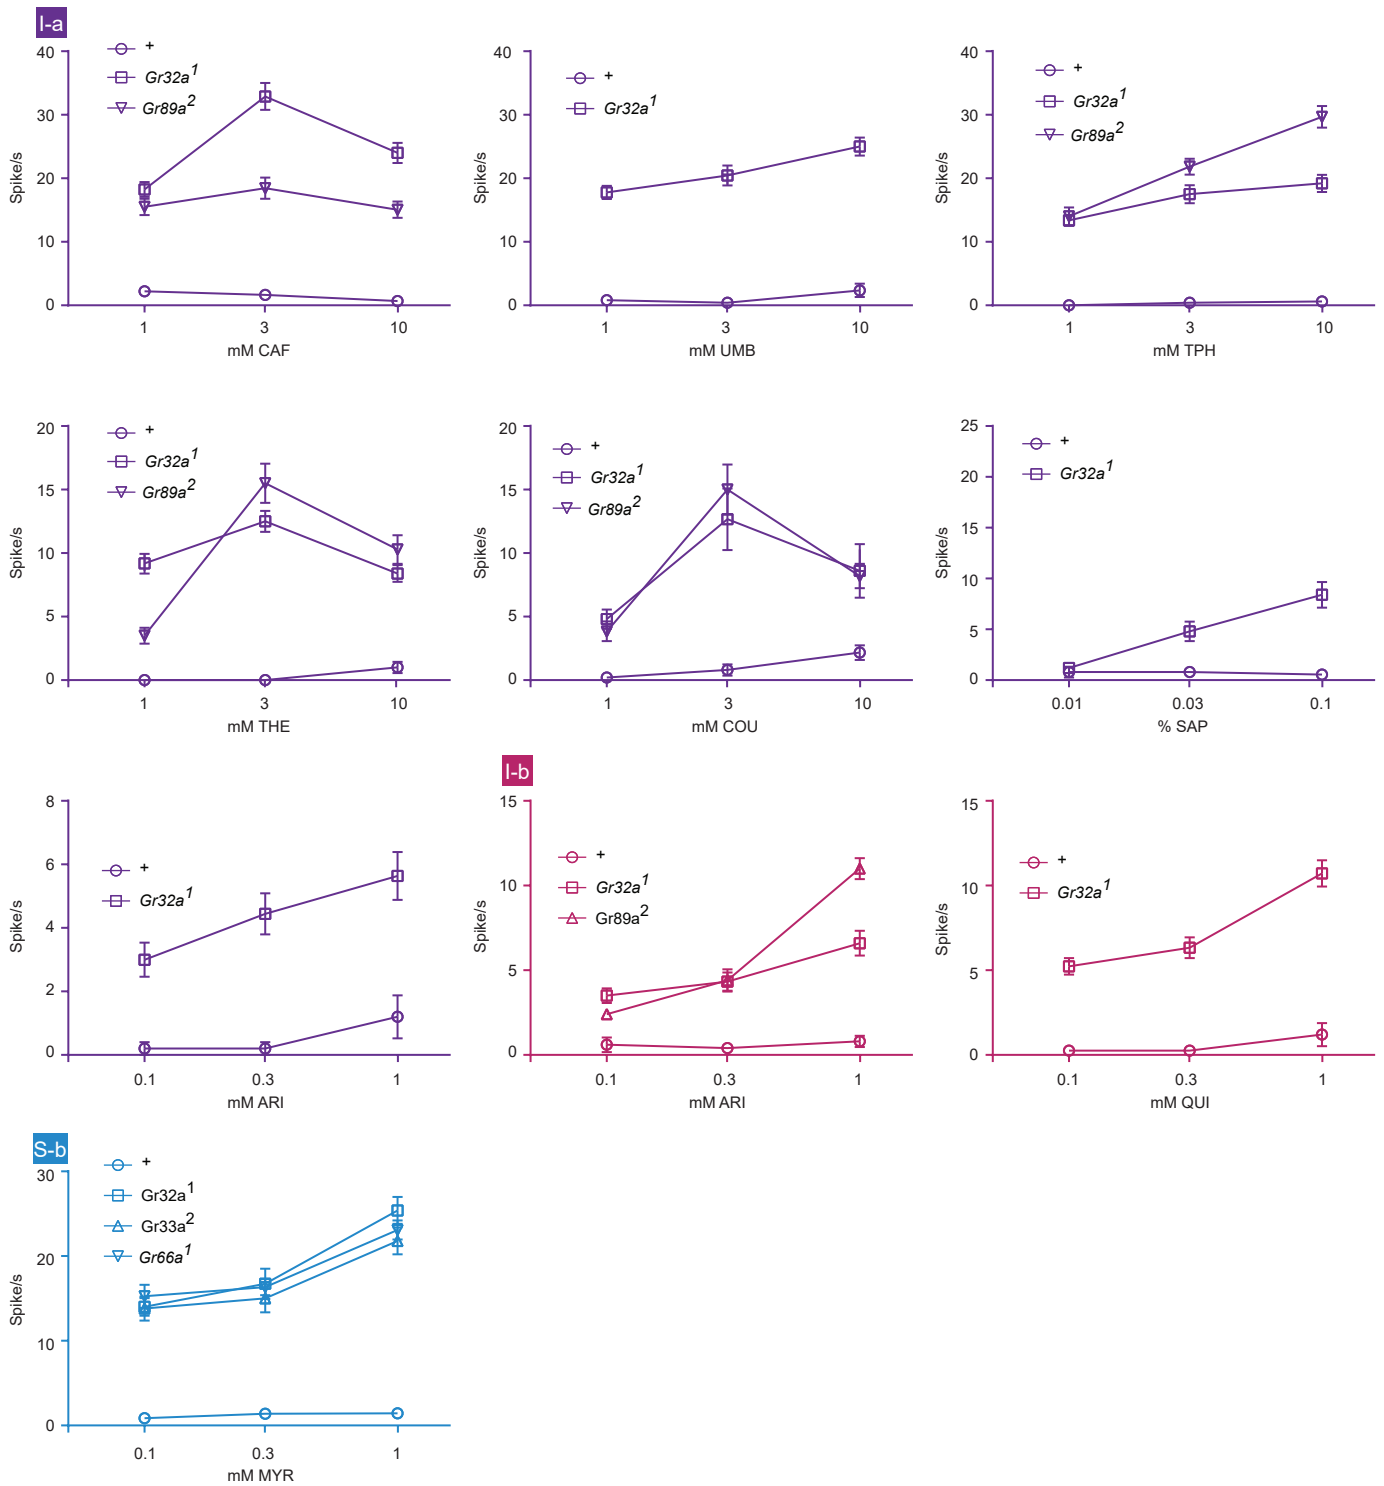

**Figure S2. Novel responses over a range of concentrations. Related to Figure 3.** Purple graphs are from I-a; red graphs are from I-b; the blue graph is from S-b. n = 6-22.

**A**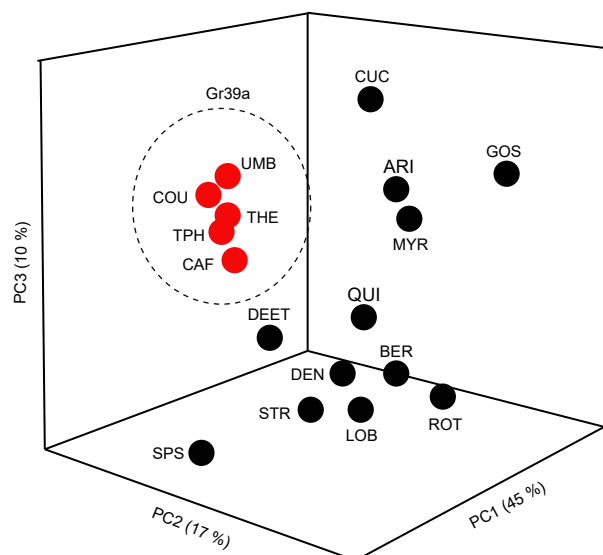**B**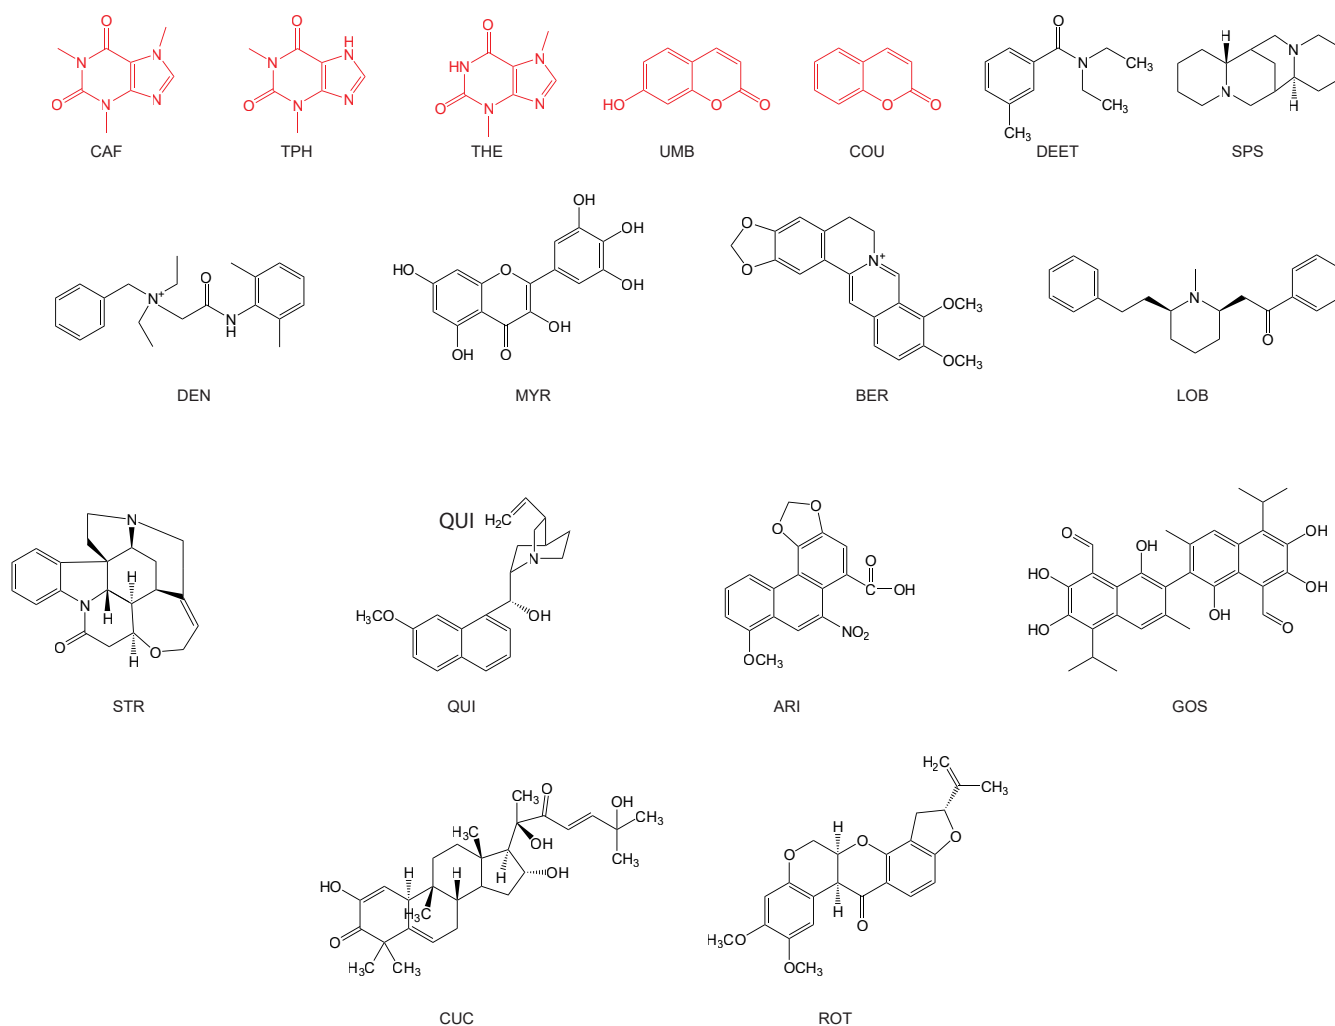

**Figure S3. The five compounds that depend on Gr39a.a all cluster together in a physicochemical tastant space. Related to Figure 4. (A) A 32-dimensional tastant space visualized by a principle component analysis. CAF, COU, THE, TPH, and UMB, depicted in red, cluster together. Four tastants are not included because the physicochemical parameters needed to map them are not available. (B) Structures of CAF, COU, THE, TPH, and UMB, containing exactly two fused rings, are depicted in red. The other mapped tastants are depicted in black.**

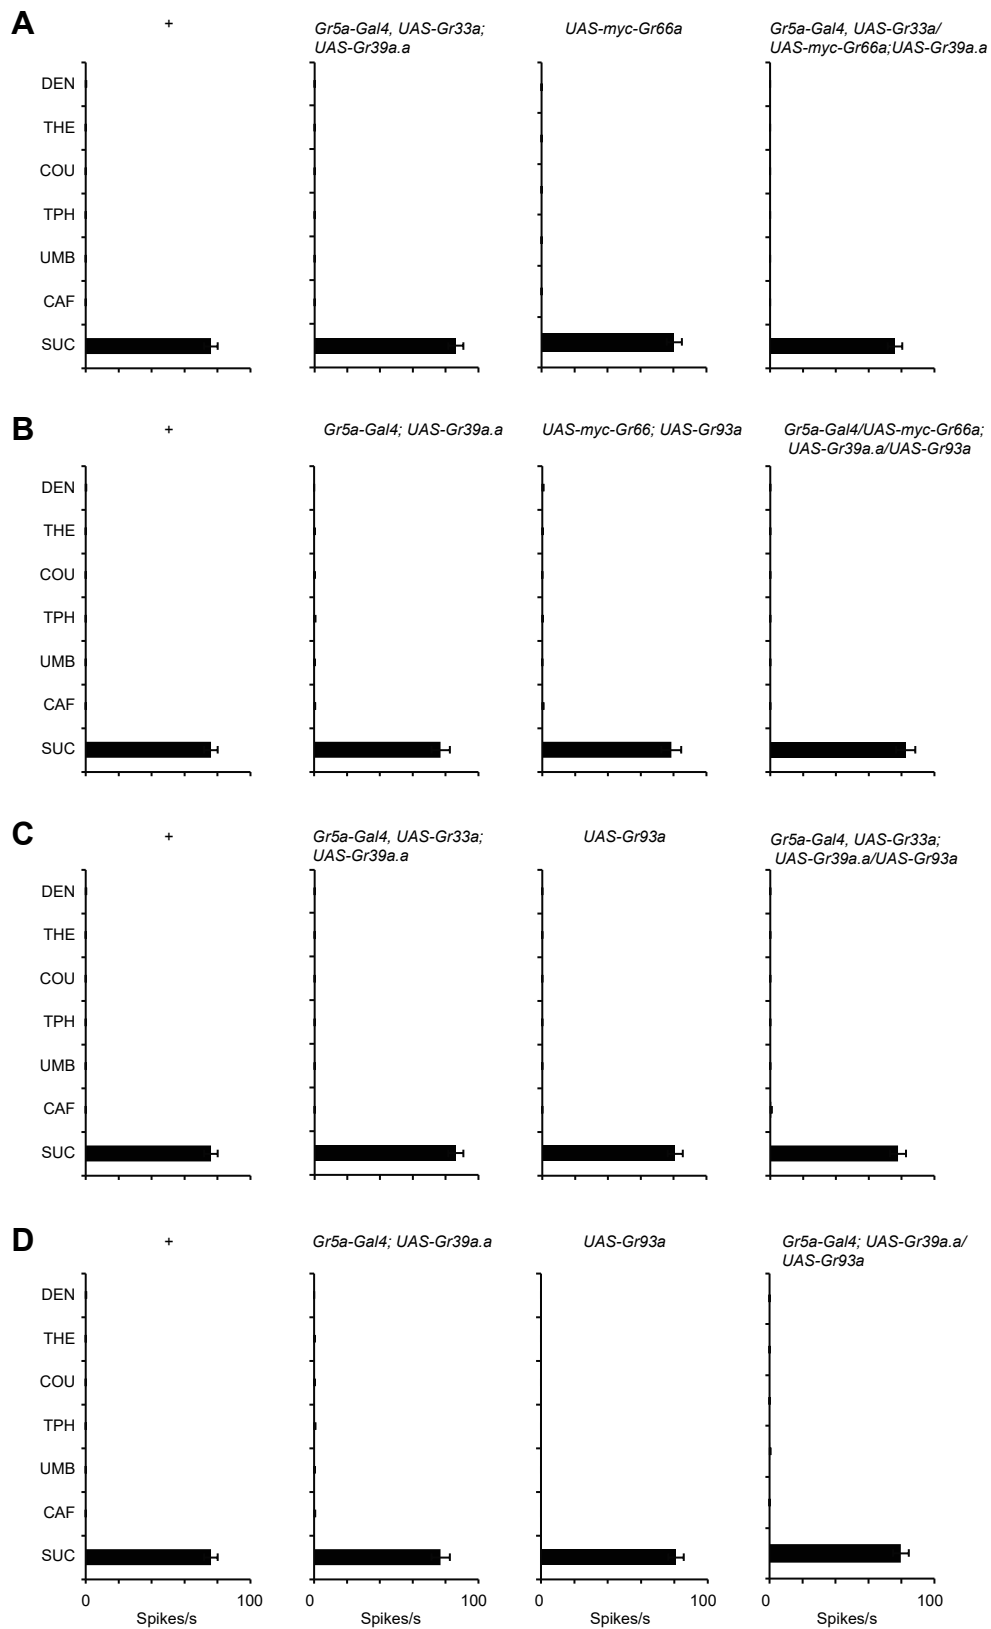

**Figure S4. Coexpression of Grs in sugar neurons. Related to Figure 5.** Neither the combination of Gr33a, Gr66a, and Gr39a.a. (A), nor the combination of Gr66a, Gr39a.a and Gr93a (B), nor the combination of Gr33a, Gr39a.a, and Gr93a (C) are sufficient to confer response to the indicated bitter compounds in a sugar-sensing neuron. Neither is Gr39a.a and Gr93a, nor Gr39a.a alone sufficient (D). n = 10-13.

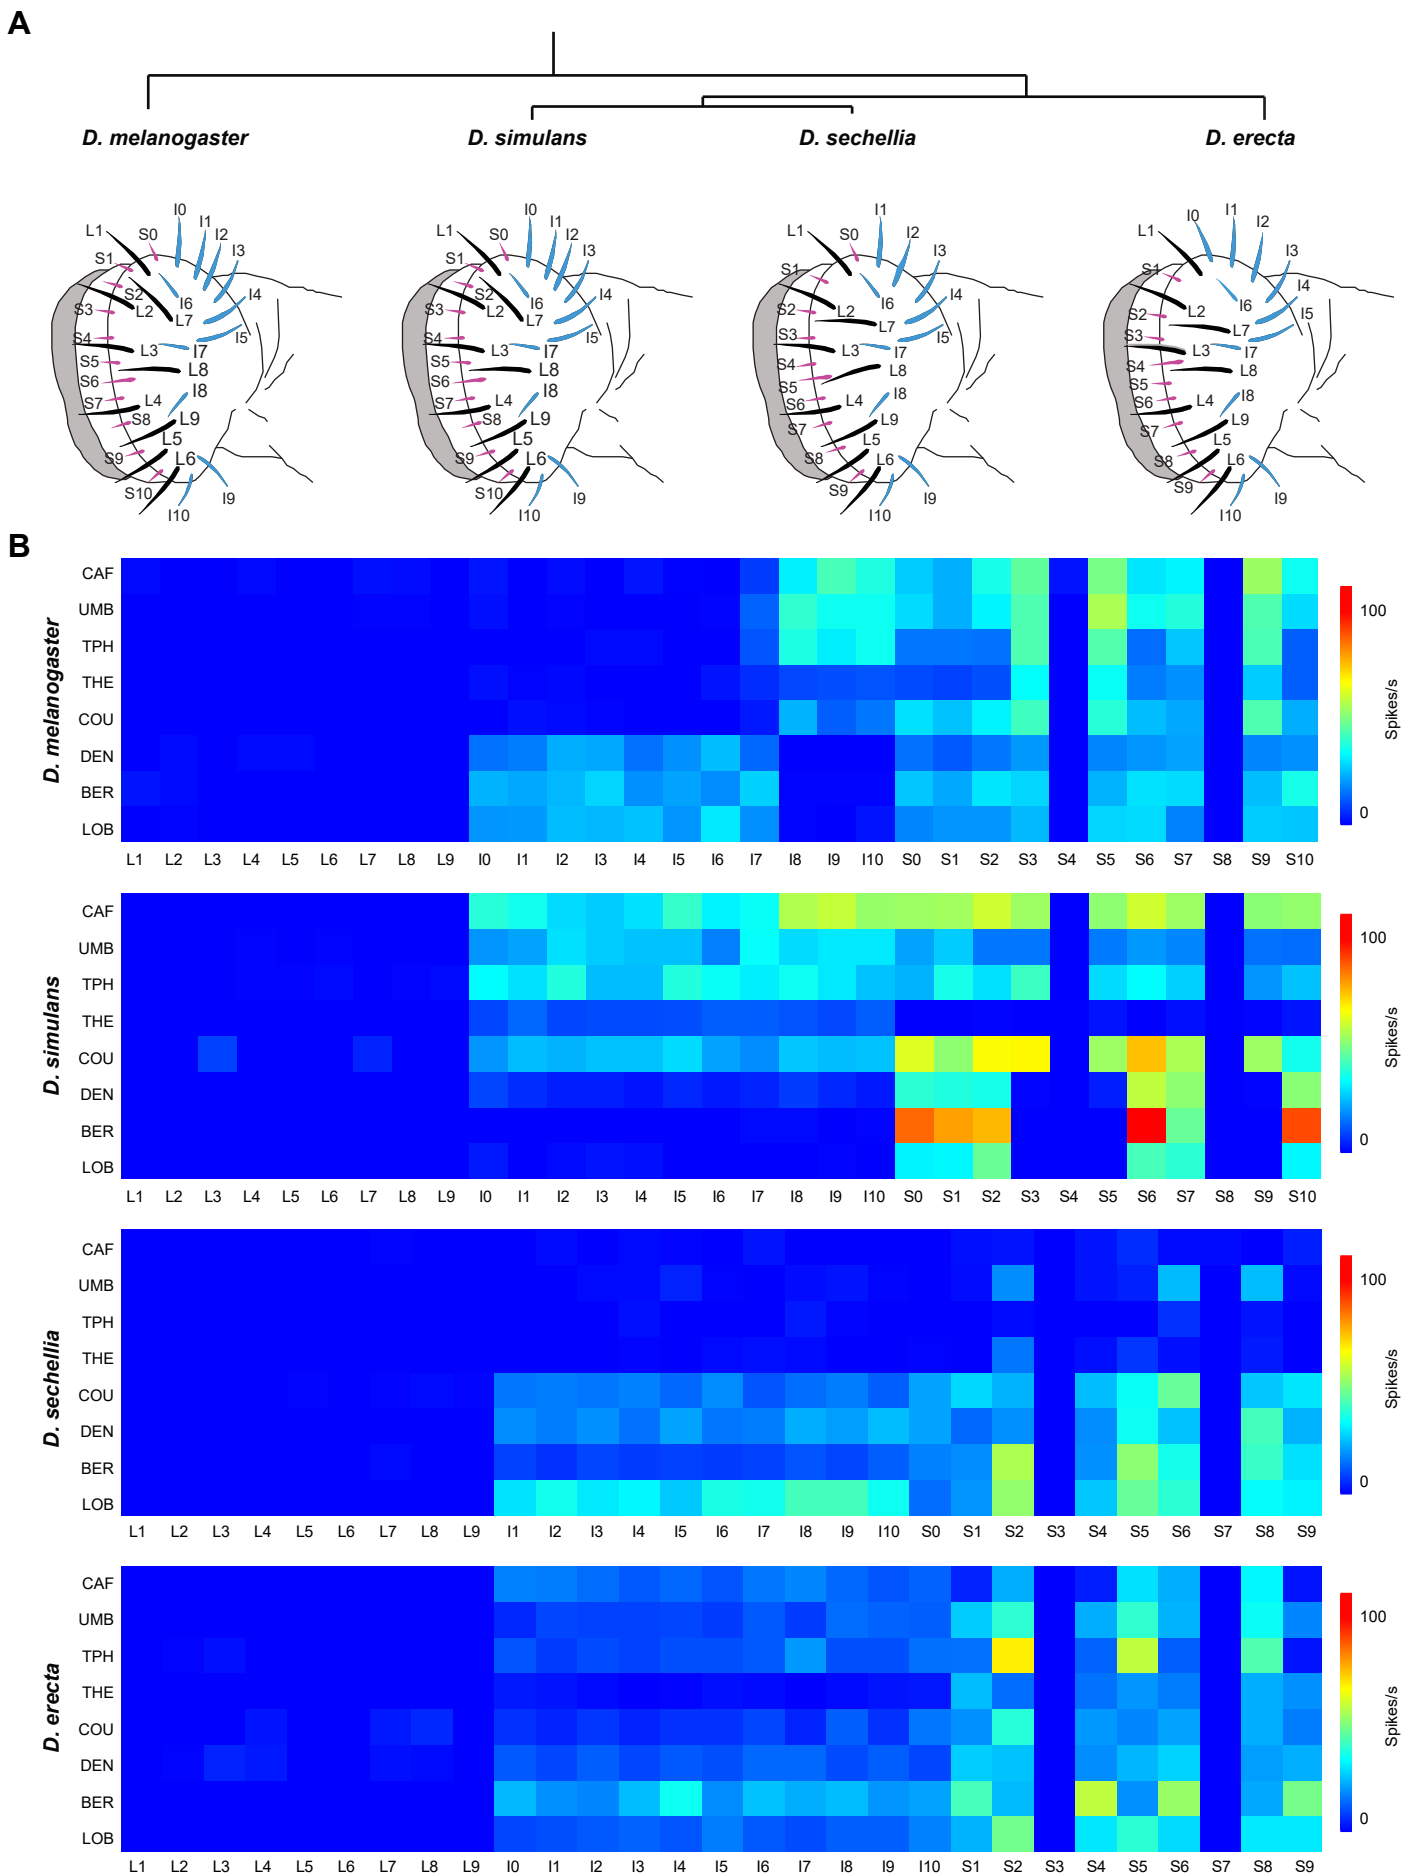

**Figure S5. Anatomy and coding of bitter taste in labella of four *Drosophila* species. Related to Figure 6.** (A) Phylogenetic relationship and organization of labellar sensilla in four species. The *D. melanogaster* used here was Canton-S, without the *w* mutation contained within the genetic background control used in other experiments. (B) Heat map of physiological responses to bitter compounds in all labellar sensilla in four species.  $n=3-10$ .

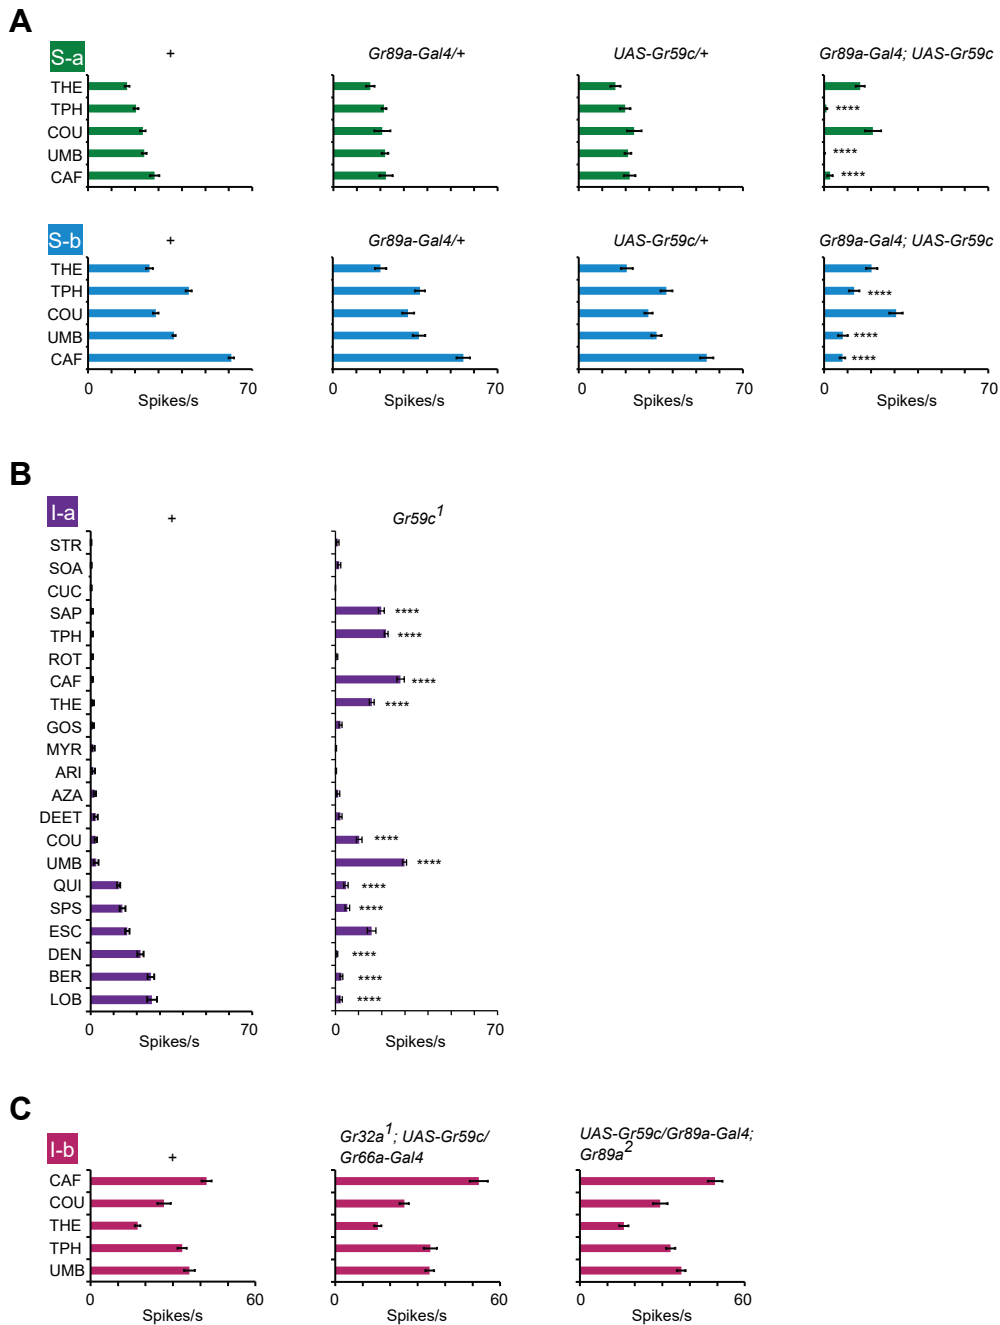

**Figure S6. Regulation of the identity of I-a. Related to Figure 7.** (A) Responses of S sensilla that ectopically express Gr59c. The control responses ("+") are from Figure 2. One-way ANOVA followed by Dunnett's multiple comparison test.  $n=10$ . (B) Responses of I-a in Gr59c- to the full tastant panel. Data for the control are from Figure 2. Mann-Whitney test,  $n=10-23$ . (C) Expression of Gr59c in I-b did not suppress response to these bitter compounds in Gr32a or Gr89a mutants. The control panel "+" is from Figure 2. One-way ANOVA followed by Dunnett's multiple comparison test.  $n=10$ .

**A**

| Target | Name                     | Sequence (5'-3')                                                                                                                                                              |
|--------|--------------------------|-------------------------------------------------------------------------------------------------------------------------------------------------------------------------------|
| Gr32a  | Gr32agRNAF<br>Gr32agRNAR | TATATAGGAAAGATATCCGGGTGAACCTC <b>GGCCATGTC</b> <b>CCCGAACACTT</b> GTTTTAGAGCTAGAAATAGCAAG<br>ATTTTAAC TTGCTATTCTAGCTCTAAAAC <b>TCACACATACTTGGTAATC</b> GACGTTAAATTGAAAATAGGTC |
| Gr33a  | Gr33agRNAF<br>Gr33agRNAR | TATATAGGAAAGATATCCGGGTGAACCTC <b>GTTACACAGAAAAAGTTATA</b> GTTTTAGAGCTAGAAATAGCAAG<br>ATTTTAAC TTGCTATTCTAGCTCTAAAAC <b>ACATAGTCTCGACTATGC</b> GACGTTAAATTGAAAATAGGTC          |
| Gr39a  | Gr39agRNAF<br>Gr39agRNAR | TATATAGGAAAGATATCCGGGTGAACCTC <b>GGCCGCTCTGTTGGGAGCAC</b> GTTTTAGAGCTAGAAATAGCAAG<br>ATTTTAAC TTGCTATTCTAGCTCTAAAAC <b>CATTGTAGCCCTGGTCTCC</b> GACGTTAAATTGAAAATAGGTC         |
| Gr59c  | Gr59cgRNAF<br>Gr59cgRNAR | TATATAGGAAAGATATCCGGGTGAACCTC <b>GATCGTGTCCAGTACTACT</b> GTTTTAGAGCTAGAAATAGCAAG<br>ATTTTAAC TTGCTATTCTAGCTCTAAAAC <b>GTAACCGGCATGAATCTAC</b> GACGTTAAATTGAAAATAGGTC          |
| Gr66a  | Gr66agRNAF<br>Gr66agRNAR | TATATAGGAAAGATATCCGGGTGAACCTC <b>GGCTTGTTCCTGACCTATAT</b> GTTTTAGAGCTAGAAATAGCAAG<br>ATTTTAAC TTGCTATTCTAGCTCTAAAAC <b>CGACCATGACACCGCGGTC</b> GACGTTAAATTGAAAATAGGTC         |
| Gr89a  | Gr89agRNAF<br>Gr89agRNAR | TATATAGGAAAGATATCCGGGTGAACCTC <b>GTTTCGGACTTCCGAGCCAAAG</b> TTTTTAGAGCTAGAAATAGCAAG<br>ATTTTAAC TTGCTATTCTAGCTCTAAAAC <b>TGGCTGAGAAAATACAAC</b> GACGTTAAATTGAAAATAGGTC        |

**B**

| Target | Name                 | Sequence (5'-3')                                                                                     |
|--------|----------------------|------------------------------------------------------------------------------------------------------|
| Gr32a  | Gr32aH1F<br>Gr32aH1R | cgaagactgggccttgcTGAAAATGTTCCAATTATCCATTAACCTTTAATAGTTAACTAATAAAAAC<br>attagcccgTGTTCCGGGACATGGCCAAC |
| Gr32a  | Gr32aH2F<br>Gr32aH2R | cctctgcagCAACATACTTGTAATCTTGATTC<br>attgacggaagagcctcgagAGAAAAGCATTGAATTGATAATTTG                    |
| Gr33a  | Gr33aH1F<br>Gr33aH1R | cgaagactgggccttgcTCCCTTCCAACCCGCGC<br>attagcccgAACTTTTCTGTGAAGTCCACTAGTTTTG                          |
| Gr39a  | Gr39aH1F<br>Gr39aH1R | cgaagactgggccttgcAGTCGAGTTCCCGACTTTTTTC<br>attagcccgCTCCCAACAGAGCGGCCA                               |
| Gr39a  | Gr39aH2F<br>Gr39aH2R | cctctgcagTGAGCCCTGGTCTCTG<br>attgacggaagagcctcgagATGTTACGGTTACATTACAGATCTG                           |
| Gr59c  | Gr59cH1F<br>Gr59cH1R | cgaagactgggccttgcGTCGAGTTTGGCAGCAAG<br>attagcccgACCGGCATGAATCTACG                                    |
| Gr59c  | Gr59cH2F<br>Gr59cH2R | cctctgcagAGTACTGGACACGATCATG<br>attgacggaagagcctcgagGTTTCAGCCAGGTCTGGATC                             |
| Gr66a  | Gr66aH1F<br>Gr66aH1R | cgaagactgggccttgcCAAAGGCACATAAATTCAAAAGACACATTTAG<br>attagcccgCCATGACACCGCGGTCT                      |
| Gr66a  | Gr66aH2F<br>Gr66aH2R | cctctgcagTAGGTGAGGAAACAGCCAATC<br>attgacggaagagcctcgagTTGCAAAAAGCTTCCAGTATAAAAATTC                   |
| Gr89a  | Gr89aH1F<br>Gr89aH1R | cgaagactgggccttgcCATAATCTGCAGTTTGGTGGC<br>attagcccgCCATGGCTTCGACTCCATTTTC                            |
| Gr89a  | Gr89aH2F<br>Gr89aH2R | cctctgcagGCTCGGAAGTCCGAAACG<br>attgacggaagagcctcgagGCTGTGATGACCAGGGAAC                               |

**C**

| Target | Name             | Sequence (5'-3')                                 |
|--------|------------------|--------------------------------------------------|
| Gr32a  | Gr32aF<br>Gr32aR | TTTCGAGGACATTCGCACCA<br>ACAGAACTTGCAGTACATCCCA   |
| Gr33a  | Gr33aF<br>Gr33aR | CACTGAATCGCCAGCAATCG<br>TCATGGTGGTGAAGCTCCAAA    |
| Gr39a  | Gr39aF<br>Gr39aR | CGGCCAACCTGCTACTTACA<br>GACCAGAGATCAGATCGCCC     |
| Gr59c  | Gr59cF<br>Gr59cR | TGGCCAGTTGCAGTTGGAAG<br>TGCAGGTGATTGGGCTCTAC     |
| Gr66a  | Gr66aF<br>Gr66aR | GTGGTGACGAAATCAGCAG<br>CGCGTTACGAAACCAGGGTA      |
| Gr89a  | Gr89aF<br>Gr89aR | TCAACGAAAATTAGTCCCCTTACA<br>CCAGCGATGGATGACCTTGA |

**Table S1. Oligonucleotides. Related to Figure 1.** (A) Oligonucleotides used to generate gRNA vectors. Black letters indicate vector sequence; red letters indicate genomic DNA sequence. (B) Oligonucleotides used to generate donor vectors. Small letters indicate vector sequence; capital letters indicate insert sequence. (C) Oligonucleotides used to confirm Gr deletions.

| I-a  | +          | Gr32a <sup>1</sup> | Gr33a <sup>2</sup> | Gr39a <sup>1</sup> | Gr66a <sup>1</sup> | Gr89a <sup>2</sup> | Gr93a <sup>3</sup> |
|------|------------|--------------------|--------------------|--------------------|--------------------|--------------------|--------------------|
| TCC  | 0.4 ± 0.3  | 1.3 ± 0.5          | 0.0 ± 0.0          | 0.4 ± 0.3          | 0.0 ± 0.0          | 0.2 ± 0.2          | 0.0 ± 0.0          |
| STR  | 0.2 ± 0.2  | 0.2 ± 0.2          | 1.2 ± 0.5          | 0.2 ± 0.2          | 0.2 ± 0.2          | 1.2 ± 0.5          | 21.3 ± 1.4         |
| SOA  | 0.2 ± 0.2  | 0.8 ± 0.3          | 0.4 ± 0.3          | 1.0 ± 0.6          | 0.2 ± 0.2          | 0.4 ± 0.3          | 22.0 ± 1.1         |
| CUC  | 0.2 ± 0.2  | 0.0 ± 0.0          | 0.0 ± 0.0          | 0.6 ± 0.3          | 0.0 ± 0.0          | 0.0 ± 0.0          | 18.4 ± 1.2         |
| SAP  | 0.5 ± 0.4  | 8.4 ± 1.3          | 0.7 ± 0.5          | 0.8 ± 0.4          | 1.0 ± 0.5          | 1.6 ± 0.5          | 15.7 ± 2.2         |
| TPH  | 0.6 ± 0.4  | 19.2 ± 1.3         | 1.0 ± 0.6          | 0.2 ± 0.2          | 1.0 ± 0.4          | 29.7 ± 1.7         | 16.0 ± 1.6         |
| ROT  | 0.6 ± 0.4  | 0.6 ± 0.4          | 1.0 ± 0.5          | 0.0 ± 0.0          | 0.0 ± 0.0          | 1.0 ± 0.5          | 14.0 ± 1.7         |
| CAF  | 0.6 ± 0.4  | 24 ± 1.6           | 1.0 ± 0.5          | 1.8 ± 0.6          | 0.2 ± 0.2          | 15.1 ± 1.3         | 0.2 ± 0.2          |
| THE  | 1.0 ± 0.4  | 8.4 ± 0.7          | 0.5 ± 0.4          | 0.4 ± 0.2          | 0.9 ± 0.5          | 10.3 ± 1.1         | 1.5 ± 0.4          |
| GOS  | 1.0 ± 0.4  | 1.0 ± 0.4          | 0.8 ± 0.3          | 0.2 ± 0.2          | 1.0 ± 0.5          | 0.4 ± 0.3          | 1.2 ± 0.8          |
| MYR  | 1.2 ± 0.5  | 2.2 ± 0.7          | 2.5 ± 0.5          | 0.6 ± 0.4          | 0.4 ± 0.3          | 0.4 ± 0.3          | 0.4 ± 0.4          |
| ARI  | 1.2 ± 0.7  | 5.6 ± 0.8          | 0.0 ± 0.0          | 0.2 ± 0.2          | 0.8 ± 0.4          | 2.2 ± 1.1          | 0.2 ± 0.2          |
| AZA  | 1.8 ± 0.5  | 0.2 ± 0.2          | 2.8 ± 0.7          | 0.9 ± 0.5          | 2.2 ± 0.7          | 1.0 ± 0.5          | 0.3 ± 0.3          |
| DEET | 2.2 ± 0.8  | 3.6 ± 1.0          | 3.3 ± 0.8          | 3.4 ± 0.6          | 1.0 ± 0.4          | 3.3 ± 0.8          | 0.0 ± 0.0          |
| COU  | 2.2 ± 0.6  | 8.6 ± 2.1          | 0.2 ± 0.2          | 3.4 ± 0.5          | 0.4 ± 0.4          | 8.2 ± 1.0          | 0.0 ± 0.0          |
| UMB  | 2.4 ± 1.0  | 25.0 ± 1.4         | 1.1 ± 0.6          | 2.4 ± 0.9          | 1.1 ± 0.6          | 6.8 ± 0.9          | 0.0 ± 0.0          |
| QUI  | 12.1 ± 0.7 | 5.2 ± 0.8          | 2.8 ± 0.6          | 10.6 ± 0.6         | 3.4 ± 0.4          | 12.0 ± 1.2         | 0.3 ± 0.3          |
| SPS  | 13.8 ± 1.2 | 5.8 ± 1.3          | 0.2 ± 0.2          | 16.6 ± 1.1         | 1.6 ± 0.7          | 12.0 ± 1.1         | 0.0 ± 0.0          |
| ESC  | 15.9 ± 0.9 | 1.5 ± 0.7          | 0.9 ± 0.3          | 17.4 ± 1.4         | 0.2 ± 0.1          | 18.9 ± 1.5         | 2.3 ± 1.0          |
| DEN  | 21.6 ± 1.4 | 1.6 ± 0.4          | 1.8 ± 0.9          | 24.3 ± 1.6         | 1.2 ± 0.5          | 24.9 ± 1.8         | 0.0 ± 0.0          |
| BER  | 24.6 ± 1.8 | 1.5 ± 0.6          | 1.8 ± 0.7          | 24.2 ± 1.8         | 1.8 ± 0.6          | 22.9 ± 1.3         | 0.0 ± 0.0          |
| LOB  | 26.1 ± 1.4 | 1.3 ± 0.4          | 0.3 ± 0.1          | 35.3 ± 1.4         | 0.7 ± 0.3          | 26.5 ± 1.2         | 0.8 ± 0.5          |

| I-b  | +          | Gr32a <sup>1</sup> | Gr33a <sup>2</sup> | Gr39a <sup>1</sup> | Gr66a <sup>1</sup> | Gr89a <sup>2</sup> | Gr93a <sup>3</sup> |
|------|------------|--------------------|--------------------|--------------------|--------------------|--------------------|--------------------|
| TCC  | 0.0 ± 0.0  | 0.0 ± 0.0          | 0.0 ± 0.0          | 0.0 ± 0.0          | 0.0 ± 0.0          | 0.0 ± 0.0          | 0.0 ± 0.0          |
| STR  | 0.2 ± 0.2  | 1.2 ± 0.7          | 0.2 ± 0.2          | 0.2 ± 0.2          | 0.2 ± 0.2          | 0.4 ± 0.3          | 0.8 ± 0.3          |
| DEET | 0.2 ± 0.2  | 1.2 ± 0.6          | 0.4 ± 0.2          | 0.4 ± 0.4          | 0.4 ± 0.4          | 0.4 ± 0.4          | 0.2 ± 0.2          |
| ROT  | 0.4 ± 0.4  | 0.0 ± 0.0          | 0.0 ± 0.0          | 0.0 ± 0.0          | 1.0 ± 0.4          | 0.0 ± 0.0          | 0.2 ± 0.2          |
| CUC  | 0.4 ± 0.4  | 0.0 ± 0.0          | 0.0 ± 0.0          | 0.0 ± 0.0          | 0.0 ± 0.0          | 1.0 ± 0.4          | 5.5 ± 1.2          |
| SOA  | 0.6 ± 0.3  | 1.4 ± 0.7          | 0.4 ± 0.3          | 1.4 ± 0.3          | 0.2 ± 0.2          | 0.2 ± 0.2          | 14.9 ± 1.8         |
| GOS  | 0.8 ± 0.8  | 0.6 ± 0.3          | 0.8 ± 0.3          | 0.2 ± 0.2          | 0.2 ± 0.2          | 1.8 ± 0.6          | 2.6 ± 0.9          |
| ARI  | 0.8 ± 0.4  | 6.6 ± 0.7          | 2.0 ± 0.5          | 2.0 ± 0.7          | 0.0 ± 0.0          | 11.0 ± 0.6         | 15.3 ± 2.0         |
| QUI  | 1.2 ± 0.7  | 10.7 ± 0.8         | 0.4 ± 0.3          | 0.6 ± 0.3          | 1.0 ± 0.3          | 2.7 ± 0.9          | 2.9 ± 0.6          |
| DEN  | 1.2 ± 0.4  | 2.5 ± 0.5          | 0.2 ± 0.2          | 1.0 ± 0.3          | 0.4 ± 0.2          | 0.6 ± 0.4          | 1.8 ± 1.0          |
| SPS  | 1.6 ± 0.6  | 0.4 ± 0.4          | 1.2 ± 0.7          | 0.4 ± 0.4          | 0.2 ± 0.2          | 0.2 ± 0.2          | 0.0 ± 0.0          |
| AZA  | 2.4 ± 0.7  | 0.8 ± 0.4          | 2.8 ± 1.0          | 1.8 ± 0.6          | 4.0 ± 1.0          | 1.6 ± 0.5          | 0.0 ± 0.0          |
| MYR  | 2.7 ± 0.8  | 1.6 ± 0.7          | 1.0 ± 0.6          | 2.0 ± 0.5          | 1.2 ± 0.8          | 1.0 ± 0.5          | 0.0 ± 0.0          |
| LOB  | 3.7 ± 0.7  | 11.8 ± 0.6         | 4.7 ± 0.8          | 4.4 ± 0.7          | 3.6 ± 0.7          | 3.7 ± 0.4          | 1.4 ± 0.8          |
| BER  | 5.1 ± 0.8  | 9.4 ± 0.7          | 4.4 ± 1.7          | 4.7 ± 0.8          | 2.6 ± 0.5          | 6.4 ± 0.9          | 0.0 ± 0.0          |
| ESC  | 16.2 ± 1.2 | 1.4 ± 0.6          | 0.0 ± 0.0          | 16.6 ± 1.1         | 0.0 ± 0.0          | 16.2 ± 1.8         | 0.6 ± 0.4          |
| THE  | 17.1 ± 1.0 | 17.5 ± 0.9         | 0.3 ± 0.3          | 0.2 ± 0.2          | 0.6 ± 0.3          | 16.0 ± 0.9         | 0.0 ± 0.0          |
| SAP  | 18.7 ± 1.3 | 16.3 ± 2.0         | 6.2 ± 0.8          | 15.3 ± 1.2         | 3.5 ± 0.4          | 14.0 ± 0.8         | 0.4 ± 0.4          |
| COU  | 26.7 ± 2.5 | 20.9 ± 2.5         | 0.2 ± 0.2          | 4.2 ± 0.7          | 0.2 ± 0.2          | 24.4 ± 1.8         | 1.6 ± 0.3          |
| TPH  | 33.3 ± 1.7 | 30.6 ± 1.3         | 1.0 ± 0.3          | 1.6 ± 0.6          | 2.2 ± 0.6          | 36.8 ± 1.2         | 0.0 ± 0.0          |
| UMB  | 36.0 ± 2.0 | 31.2 ± 2.5         | 2.0 ± 0.8          | 1.2 ± 0.6          | 2.8 ± 0.7          | 33.9 ± 1.2         | 0.4 ± 0.4          |
| CAF  | 42.2 ± 1.8 | 43.8 ± 1.8         | 0.8 ± 0.4          | 1.9 ± 0.7          | 0.2 ± 0.2          | 46.4 ± 2.0         | 0.4 ± 0.4          |

| S-a  | +          | Gr32a <sup>1</sup> | Gr33a <sup>2</sup> | Gr39a <sup>1</sup> | Gr66a <sup>1</sup> | Gr89a <sup>2</sup> | Gr93a <sup>3</sup> |
|------|------------|--------------------|--------------------|--------------------|--------------------|--------------------|--------------------|
| TCC  | 1.4 ± 0.4  | 1.2 ± 0.9          | 0.0 ± 0.0          | 0.8 ± 0.4          | 0.0 ± 0.0          | 1.4 ± 0.5          | 0.8 ± 0.8          |
| MYR  | 2.8 ± 1.0  | 4.7 ± 1.5          | 3.6 ± 1.4          | 2.1 ± 0.6          | 2.9 ± 0.5          | 1.3 ± 0.5          | 34.7 ± 2.5         |
| ESC  | 4.0 ± 0.8  | 6.2 ± 0.7          | 4.9 ± 1.5          | 2.5 ± 0.9          | 5.5 ± 1.0          | 2.6 ± 0.8          | 27.3 ± 2.5         |
| ROT  | 4.0 ± 0.7  | 4.8 ± 0.7          | 4.0 ± 0.5          | 4.3 ± 0.6          | 4.8 ± 0.8          | 5.6 ± 0.7          | 3.3 ± 0.4          |
| GOS  | 4.4 ± 0.7  | 2.7 ± 0.5          | 10.7 ± 2.2         | 6.6 ± 1.1          | 5.8 ± 1.1          | 5.6 ± 1.2          | 33.6 ± 2.8         |
| ARI  | 13.8 ± 1.2 | 16.7 ± 1.2         | 15 ± 1.9           | 14.6 ± 1.1         | 16.0 ± 1.7         | 16.0 ± 1.1         | 30.7 ± 3.6         |
| DEET | 14.5 ± 0.6 | 0.5 ± 0.4          | 0.0 ± 0.0          | 17.0 ± 1.8         | 1.0 ± 0.4          | 13.8 ± 0.8         | 26.2 ± 1.9         |
| SAP  | 15.8 ± 1.6 | 20.7 ± 3.3         | 21.1 ± 1.4         | 22.1 ± 1.4         | 17.5 ± 1.7         | 18.4 ± 1.4         | 28.2 ± 2.0         |
| THE  | 16.6 ± 1.0 | 20.2 ± 1.0         | 17.5 ± 1.0         | 19.2 ± 1.2         | 19.8 ± 1.2         | 12.2 ± 1.2         | 29.7 ± 2.4         |
| QUI  | 19.4 ± 0.7 | 9.5 ± 1.6          | 5.8 ± 0.8          | 22.8 ± 1.3         | 19.2 ± 1.7         | 17.8 ± 1.1         | 29.8 ± 4.2         |
| TPH  | 20.5 ± 1.0 | 22.6 ± 1.9         | 4.6 ± 1.2          | 9.2 ± 1.0          | 3.4 ± 0.7          | 23.8 ± 2.4         | 21.0 ± 2.1         |
| CUC  | 21.3 ± 1.8 | 2.1 ± 0.9          | 1.9 ± 0.7          | 30.2 ± 1.4         | 4.7 ± 1.2          | 18.8 ± 1.5         | 20.0 ± 1.7         |
| SOA  | 22.4 ± 1.0 | 1.1 ± 0.4          | 8.3 ± 1.4          | 26.0 ± 0.9         | 4.8 ± 1.1          | 20.0 ± 0.7         | 4.0 ± 1.8          |
| COU  | 23.4 ± 1.2 | 20.2 ± 1.6         | 6.8 ± 1.5          | 22.2 ± 2.7         | 2.4 ± 0.5          | 17.8 ± 1.1         | 18.8 ± 1.7         |
| STR  | 23.7 ± 1.0 | 0.4 ± 0.3          | 0.3 ± 0.2          | 41.1 ± 1.7         | 1.7 ± 0.9          | 30.9 ± 0.8         | 19.4 ± 2.1         |
| UMB  | 24.0 ± 1.0 | 27.8 ± 1.7         | 12.4 ± 2.3         | 17.0 ± 1.5         | 3.2 ± 0.8          | 19.1 ± 1.1         | 19.3 ± 2.0         |
| DEN  | 24.3 ± 0.9 | 0.6 ± 0.2          | 1.3 ± 0.5          | 35.3 ± 1.4         | 2.3 ± 0.6          | 24.1 ± 1.0         | 13.2 ± 1.0         |
| SPS  | 26.7 ± 1.1 | 4.9 ± 1.5          | 12.3 ± 1.1         | 50.6 ± 3.1         | 15.4 ± 1.1         | 26.9 ± 1.0         | 13.3 ± 0.7         |
| BER  | 26.9 ± 1.1 | 1.1 ± 0.4          | 0.5 ± 0.3          | 33.9 ± 1.9         | 6.2 ± 1.0          | 26.0 ± 1.7         | 6.0 ± 1.7          |
| CAF  | 28.4 ± 1.9 | 36.9 ± 1.6         | 0.5 ± 0.3          | 2.3 ± 0.5          | 0.4 ± 0.3          | 27.9 ± 2.2         | 5.5 ± 1.7          |
| AZA  | 29.9 ± 1.0 | 3.3 ± 0.6          | 33.6 ± 2.5         | 37.0 ± 1.9         | 15.0 ± 1.5         | 25.9 ± 2.2         | 5.0 ± 1.1          |
| LOB  | 40.5 ± 1.5 | 2.5 ± 0.8          | 0.1 ± 0.1          | 38.0 ± 1.5         | 22.1 ± 1.3         | 34.4 ± 1.1         | 1.1 ± 0.6          |

| S-b  | +          | Gr32a <sup>1</sup> | Gr33a <sup>2</sup> | Gr39a <sup>1</sup> | Gr66a <sup>1</sup> | Gr89a <sup>2</sup> | Gr93a <sup>3</sup> |
|------|------------|--------------------|--------------------|--------------------|--------------------|--------------------|--------------------|
| TCC  | 3.0 ± 0.9  | 5.3 ± 1.5          | 5.2 ± 1.3          | 1.4 ± 0.6          | 0.0 ± 0.0          | 4.0 ± 0.6          | 4.4 ± 1.6          |
| MYR  | 1.4 ± 0.4  | 25.4 ± 1.6         | 21.8 ± 1.6         | 3.0 ± 1.2          | 23.1 ± 1.1         | 2.2 ± 0.7          | 7.8 ± 1.8          |
| GOS  | 5.8 ± 1.1  | 5.2 ± 0.9          | 14.8 ± 1.3         | 5.4 ± 1.2          | 5.7 ± 0.8          | 8.5 ± 1.4          | 0.7 ± 0.5          |
| ROT  | 5.8 ± 0.6  | 6.0 ± 0.7          | 6.2 ± 0.8          | 5.3 ± 0.7          | 5.5 ± 0.5          | 4.7 ± 0.6          | 37.2 ± 3.3         |
| ESC  | 13.5 ± 1.0 | 16.8 ± 1.7         | 17.9 ± 1.3         | 14.2 ± 1.3         | 15.0 ± 1.0         | 13.5 ± 1.1         | 4.5 ± 0.8          |
| DEET | 14.9 ± 1.1 | 0.8 ± 0.3          | 1.8 ± 0.7          | 23.1 ± 1.4         | 0.7 ± 0.3          | 15.0 ± 1.2         | 36.5 ± 2.9         |
| QUI  | 15.3 ± 1.2 | 11.1 ± 0.7         | 13.7 ± 0.9         | 28.3 ± 1.8         | 4.2 ± 0.6          | 14.0 ± 1.3         | 34.7 ± 3.7         |
| ARI  | 16.4 ± 0.9 | 21.2 ± 1.4         | 20.0 ± 1.1         | 17.1 ± 1.2         | 19.3 ± 1.4         | 19.5 ± 1.4         | 33.5 ± 2.6         |
| BER  | 21.0 ± 1.2 | 8.3 ± 0.7          | 7.6 ± 1.0          | 36.8 ± 2.3         | 3.3 ± 0.6          | 20.8 ± 1.2         | 29.7 ± 3.8         |
| DEN  | 21.5 ± 0.9 | 1.1 ± 0.3          | 0.8 ± 0.8          | 40.0 ± 1.8         | 0.3 ± 0.2          | 28.8 ± 1.1         | 24.8 ± 0.6         |
| STR  | 22.5 ± 1.8 | 4.1 ± 1.1          | 2.6 ± 1.3          | 38.3 ± 1.6         | 0.6 ± 0.3          | 29.6 ± 1.7         | 29.1 ± 2.2         |
| SOA  | 23.5 ± 1.3 | 8.0 ± 0.7          | 19.6 ± 0.7         | 22.1 ± 1.0         | 1.5 ± 0.5          | 22.7 ± 1.2         | 24.7 ± 2.2         |
| SAP  | 23.6 ± 1.8 | 28.6 ± 1.0         | 28.5 ± 1.5         | 27.0 ± 1.5         | 28.7 ± 1.1         | 22.9 ± 1.3         | 26.0 ± 2.2         |
| CUC  | 25.6 ± 2.4 | 3.1 ± 0.7          | 7.2 ± 1.9          | 36.8 ± 1.3         | 3.8 ± 2.1          | 21.4 ± 1.3         | 25.4 ± 3.2         |
| THE  | 26.2 ± 1.4 | 31.5 ± 2.1         | 31.5 ± 1.3         | 25.0 ± 1.3         | 31.8 ± 1.6         | 30.2 ± 3.0         | 23.6 ± 1.8         |
| COU  | 28.9 ± 1.2 | 30.3 ± 2.1         | 24.3 ± 2.1         | 23.8 ± 1.4         | 3.2 ± 1.3          | 29.2 ± 2.0         | 15.4 ± 1.8         |
| SPS  | 33.3 ± 1.4 | 29.7 ± 1.1         | 24.5 ± 1.3         | 57.5 ± 3.1         | 17.4 ± 1.6         | 34.2 ± 1.6         | 13.7 ± 0.8         |
| AZA  | 33.6 ± 1.1 | 6.6 ± 1.8          | 37.6 ± 1.7         | 41.4 ± 2.8         | 4.4 ± 1.7          | 32.0 ± 2.2         | 16.7 ± 1.6         |
| UMB  | 36.7 ± 0.7 | 40.8 ± 0.7         | 22.6 ± 1.2         | 23.1 ± 1.6         | 4.2 ± 0.8          | 36.9 ± 2.8         | 14.7 ± 1.3         |
| LOB  | 38.8 ± 1.6 | 5.5 ± 0.8          | 1.7 ± 0.5          | 41.2 ± 1.3         | 0.9 ± 0.3          | 39.4 ± 0.9         | 6.5 ± 1.0          |
| TPH  | 42.9 ± 1.3 | 44.7 ± 1.7         | 30.6 ± 1.0         | 16.6 ± 1.6         | 18.6 ± 1.3         | 47.8 ± 2.0         | 6.3 ± 1.8          |
| CAF  | 61.1 ± 1.2 | 58.7 ± 2.2         | 22.2 ± 1.7         | 7.0 ± 1.3          | 12.4 ± 1.2         | 59.4 ± 1.7         | 2.4 ± 1.2          |

**Table S2. Responses in spikes/s of bitter neuron classes to tastants. Related to Figure 2.** All errors are SEM. n>10 for 98% of the 587 genotype-tastant-sensillum class combinations; 7<n<10 for the remaining 2%.





## **Supplemental references**

- S1. Poudel, S., and Lee, Y. (2016). Gustatory Receptors Required for Avoiding the Toxic Compound Coumarin in *Drosophila melanogaster*. *Mol Cells* 39, 310-315.
